# Supplementary material for: Pre-Acclimation to Elevated Temperature Stabilizes the Activity of Photosystem I in Wheat Plants Exposed to an Episode of Severe Heat Stress
Source: MDPI journal article supplement (doi:10.3390/plants11050616), 2022-02-24
Supplement: s1 [file s1]

Thesee

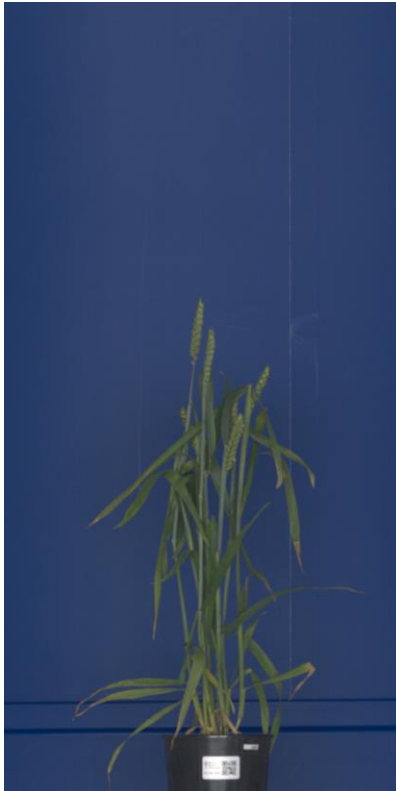

Roter Samtiger  
Kolbenweizen

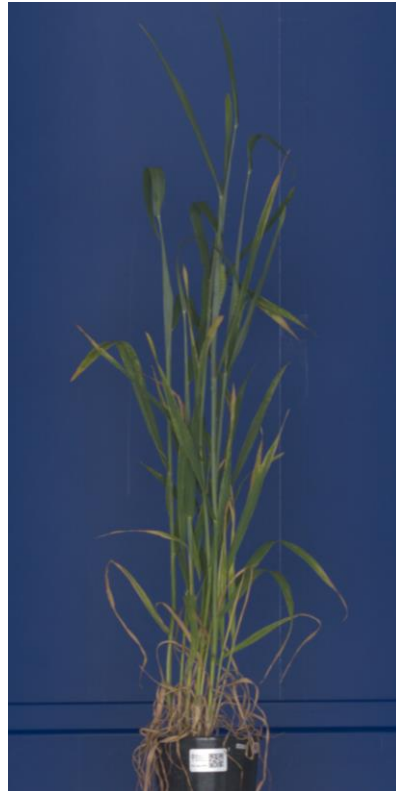

ANK 32A

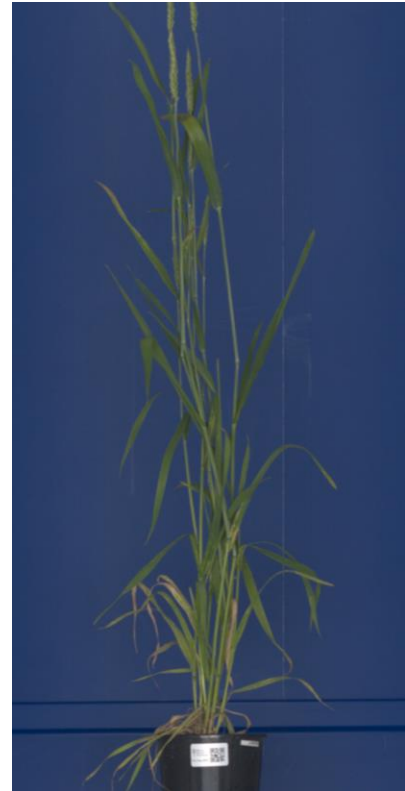

**Supplementary Figure S1.** The phenotype of three genotypes of winter wheat (*Triticum* sp.) used in the study in growth stage of anthesis, with fully developed flag leaves: Thesee (*Triticum aestivum* L., Germany), Roter Samtiger Kolbenweizen (*Triticum compactum* Host., Germany) and ANK 32A (*Triticum aestivum* L., Russia).
